# Supplementary material for: Association between host species choice and morphological characters of main sensory structures of Culicoides in the Palaeartic region
Source: PeerJ. 2017 Jul 27;5:e3478. doi: 10.7717/peerj.3478 (PMC5534160; doi:10.7717/peerj.3478)
Supplement: Data S1 [file peerj-05-3478-s001.xlsx]

## Sheet: Code
	Antenna Flagellomer-Sensilla coeloconica- number		Antenna Flagellomer-Sensilla coeloconica-Segment-IV-X		Antenna Flagellomer-Sensilla coeloconica-Segment-XI-XV		Palp-3rd palpal segment-sensory pits-Number		Palp-3rd palpal segment-single sensory pit-opening versus depth = large/small		Palp-3rd palpal segment-Shape		Antenna-Short-segment-Shape-Flask-Shape		Antenna-Short sensilla trichodea, distal part segment IV to X-Number		Antennal XI/X ratio, length of segment XI divided by length of segment X - Range		Cibarial armature		Pharynx posterior armature		Eyes-Inter Ocular-Space-Shape		Hote preference			Species
Species																										HP-Mammals	HP-Birds
	Descriptor codes: 0= (0-6); 1=(7-10); 2=(11-13)		Descriptor codes: 0=absence; 1=presence		Descriptor codes: 0=absence; 1=presence		Descriptor codes: 0= multiple; 1=single; 2= multiple and single		Descriptor codes: 0=small; 1=large; 2= small and large		Descriptor codes:0=strongly swollen; 1=triangular and moderately swollen; 2=slender or slightly swollen, triangular and moderately swollen; 3=slender or slightly swollen		Descriptor codes: 0=inflated; 1=Flask shape; 2=inflated and flask		Descriptor codes: 0=2 seta; 1=1 seta		Descriptor codes: >2=0; <=2=1; 2= <=2 and >2		Descriptor codes: 0=absence; 1=presence		Descriptor codes: 0=absence; 1=presence		Descriptor codes: 1=separated narrowly; 2=joined for a short distance; 3=1 and 2 or 2 and 4 , 4=joined for a long distance; 5=separated widely			Descriptor codes: 1=Mammals, 0= birds	Descriptor codes: 0=Mammals, 1= birds
	Number	Value assigment	Character	Value assigment	Character	Value assigment	Character	Value assigment	Character	Value assigment	Character	Value assigment	Character	Value assigment	Character	Value assigment	Character	Value assigment	Character	Value assigment	Character	Value assigment	Character	Value assigment	Character	Value assigment	Value assigment
achrayi	6	0	Absence	0	presence	1	multiple irregular pits	0	small	0	triangular and moderately swollen	1	flask shape	1	1 seta each	1	<= 2	1	absence	0	absence	0	separated narrowly	1	Mammals, birds	1	1	achrayi
alazanicus	13	2	Presence	1	presence	1	single	1	wide opening and shallow pit	1	triangular and moderately swollen	1	inflated	0	2 seta each	0	> 2	0	absence	0	absence	0	separated narrowly	1	Mammals, birds	1	1	alazanicus
albicans	6	0	Absence	0	presence	1	multiple irregular pits	0	small	0	triangular and moderately swollen	1	flask shape	1	1 seta each	1	<= 2	1	absence	0	absence	0	separated narrowly, joined for a short distance	3	Mammals	1	0	albicans
brunnicans	3,4,8	1	Presence	1	presence	1	multiple irregular pits	0	small	0	triangular and moderately swollen	1	flask shape	1	2 seta each	0	<= 2	1	absence	0	absence	0	separated narrowly	1	Mammals	1	0	brunnicans
cataneii	12	2	Presence	1	presence	1	single	1	wide opening and shallow pit	1	triangular and moderately swollen	1	flask shape	1	1 seta each	1	<= 2	1	absence	0	absence	0	separated narrowly	1	Mammals	1	0	cataneii
chiopterus	6	0	Absence	0	presence	1	single	1	narrow opening and shallow pit	0	slender or slightly swollen, triangular and moderately swollen	2	flask shape	1	1 seta each	1	<= 2	1	absence	0	absence	0	joined for a short distance	2	Mammals, birds	1	1	chiopterus
circumscriptus	13	2	Presence	1	presence	1	single	1	wide opening and shallow pit	1	triangular and moderately swollen	1	flask shape	1	2 seta each	0	<= 2; >2	2	absence	0	presence	1	separated narrowly	1	Mammals birds	1	1	circumscriptus
clastrieri	6	0	Absence	0	presence	1	single	1	wide opening and shallow pit	1	triangular and moderately swollen	1	flask shape	1	2 seta each	0	<= 2; >2	2	absence	0	presence	1	separated narrowly	1	Mammals, birds	1	1	clastrieri
deltus	6	0	Absence	0	presence	1	multiple irregular pits	0	small	0	slender or slightly swollen	3	flask shape	1	1 seta each	1	<=2	1	absence	0	absence	0	joined for a long distance	4	Mammals	1	0	deltus
dewulfi	6	0	Absence	0	presence	1	single	1	small	0	slender or slightly swollen, triangular and moderately swollen	2	flask shape	1	1 seta each	1	<=2	1	absence	0	absence	0	joined for a short distance	2	Mammals	1	0	dewulfi
duddingstoni	13	2	Presence	1	presence	1	single	1	wide opening and shallow pit	1	triangular and moderately swollen	1	flask shape	1	2 seta each	0	<=2	1	absence	0	absence	0	separated narrowly	1	Birds	0	1	duddingstoni
fagineus	6	0	Absence	0	presence	1	multiple irregular pits	0	small	0	slender or slightly swollen	3	flask shape	1	1 seta each	1	<=2	1	presence	1	absence	0	joined for a long distance	4	Mammals	1	0	fagineus
fascipennis	6	0	Absence	0	presence	1	multiple irregular pits	0	small	0	triangular and moderately swollen	1	flask shape	1	1 seta each	1	<=2	1	absence	0	absence	0	separated narrowly	1	Mammals, birds	1	1	fascipennis
festivipennis	13	2	Presence	1	presence	1	single	1	wide opening and shallow pit	1	triangular and moderately swollen	1	flask shape	1	2 seta each	0	<=2; >2	2	absence	0	presence	1	separated narrowly	1	Mammals, birds	1	1	festivipennis
furcillatus	6	0	Absence	0	presence	1	single	1	narrow opening and shallow pit	0	triangular and moderately swollen	1	flask shape	1	1 seta each	1	<=2	1	absence	0	absence	0	separated narrowly	1	Mammals	1	0	furcillatus
gejgelensis	13	2	Presence	1	presence	1	single	1	wide opening and shallow pit	1	triangular and moderately swollen	1	flask shape	1	1 seta each	1	<=2	1	absence	0	absence	0	separated narrowly	1	Mammals	1	0	gejgelensis
griseidorum	13	2	Presence	1	presence	1	multiple irregular pits	0	small	0	triangular and moderately swollen	1	flask shape	1	2 seta each	0	<=2	1	absence	0	absence	0	separated narrowly	1	Mammals, birds	1	1	griseidorsum
grisescens	6	0	Absence	0	presence	1	multiple irregular pits	0	small	0	slender or slightly swollen	3	flask shape	1	1 seta each	1	<=2	1	absence	0	absence	0	joined for a short distance	2	Mammals	1	0	grisescens
haranti	13	2	Presence	1	presence	1	single	1	narrow opening and deep pit	0	strongly swollen	0	flask shape	1	2 seta each	0	<=2	1	absence	0	absence	0	separated narrowly	1	Mammals	1	0	haranti
heliophilus	6	0	Absence	0	presence	1	single	1	wide opening and shallow pit	1	triangular and moderately swollen	1	inflated, flask	2	1 seta each	1	<=2	1	presence	1	absence	0	separated narrowly	1	Mammals	1	0	heliophilus
imicola	6	0	Absence	0	presence	1	single; multiple irregular pits	2	small	0	slender or slightly swollen, triangular and moderately swollen	2	flask shape	1	1 seta each	1	<=2	1	absence	0	absence	0	joined for a short distance	2	Mammals, birds	1	1	imicola
impunctatus	6	0	Absence	0	presence	1	multiple irregular pits	0	small	0	slender or slightly swollen	3	flask shape	1	1 seta each	1	<=2	1	absence	0	absence	0	joined for a short distance, joined for a long distance	3	Mammals	1	1	impunctatus
jumineri	9	1	Presence	1	presence	1	single	1	wide opening and shallow pit	1	triangular and moderately swollen	1	flask shape	1	1 seta each	1	<=2	1	absence	0	absence	0	separated narrowly	1	Mammals, Birds, Reptiles, Insects	1	1	jumineri
kibunensis	13	2	Presence	1	presence	1	single	1	wide opening and shallow pit	1	triangular and moderately swollen	1	inflated	0	2 seta each	0	>=2	1	absence	0	absence	0	separated narrowly	1	Mammals, birds	1	1	kibunensis
longipennis	8	1	Presence	1	absence	0	single	1	wide opening and shallow pit	1	strongly swollen, triangular and moderately swollen	2	inflated	0	1 seta each	1	<=2	1	absence	0	presence	1	separated narrowly	1	Mammals	1	0	longipennis
lupicaris	6	0	Absence	0	presence	1	multiple irregular pits	0	small	0	slender or slightly swollen, triangular and moderately swollen	2	flask shape	1	1 seta each	1	<=2	1	absence	0	absence	0	joined for a short distance	2	Mammals	1	0	lupicaris
maritimus	13	2	Presence	1	presence	1	single	1	wide opening and shallow pit	1	triangular and moderately swollen	1	flask shape	1	2 seta each	0	<=2	1	absence	0	absence	0	separated narrowly	1	Mammals	1	0	maritimus
minutissimus	8	1	Presence	1	absence	0	single	1	narrow opening and shallow pit, wide opening and shallow pit	2	triangular and moderately swollen	1	inflated, flask	2	1 seta each	1	<=2	1	absence	0	absence	0	separated widely	5	Birds	0	1	minutissimus
montanus	6	0	Absence	0	presence	1	single	1	narrow opening and deep pit	0	triangular and moderately swollen	1	flask shape	1	1 seta each	1	<=2	1	absence	0	absence	0	joined for a short distance	2	Mammals	1	0	montanus
newsteadi	6	0	Absence	0	presence	1	multiple irregular pits	0	small	0	slender or slightly swollen, triangular and moderately swollen	2	flask shape	1	1 seta each	1	<=2	1	absence	0	absence	0	joined for a short distance	2	Mammals, birds	1	1	newsteadi
obsoletus	6	0	Absence	0	presence	1	single	1	narrow opening and shallow pit	0	slender or slightly swollen, triangular and moderately swollen	2	flask shape	1	1 seta each	1	<=2	1	absence	0	absence	0	joined for a short distance	2	Mammals, birds	1	1	obsoletus
pallidicornis	6	0	Absence	0	presence	1	multiple irregular pits	0	small	0	triangular and moderately swollen	1	flask shape	1	1 seta each	1	<=2	1	absence	0	absence	0	separated narrowly	1	Mammals, birds	1	1	pallidicornis
parroti	4	0	Presence	1	absence	0	multiple irregular pits	0	small	0	slender or slightly swollen	3	flask shape	1	1 seta each	1	<=2	1	absence	0	absence	0	separated widely	5	Mammals	1	0	parroti
pictipennis	13	2	Presence	1	presence	1	single	1	wide opening and shallow pit	1	triangular and moderately swollen	1	flask shape	1	2 seta each	0	>2	0	absence	0	absence	0	separated narrowly	1	Mammals, birds	1	1	pictipennis
picturatus	6	0	Absence	0	presence	1	single, multiple irregular pits	2	small	0	triangular and moderately swollen	1	flask shape	1	1 seta each	1	<=2	1	absence	0	absence	0	separated narrowly	1	Mammals	1	0	picturatus
poperinghensis	6	0	Absence	0	presence	1	multiple irregular pits	0	small	0	slender or slightly swollen, triangular and moderately swollen	2	flask shape	1	1 seta each	1	<=2	1	absence	0	absence	0	separated narrowly	1	Mammals	1	0	poperinghensis
pulicaris	6	0	Absence	0	presence	1	multiple irregular pits	0	small	0	slender or slightly swollen, triangular and moderately swollen	2	flask shape	1	1 seta each	1	<=2	1	absence	0	absence	0	joined for a short distance	2	Mammals, birds	1	1	pulicaris
punctatus	6	0	Absence	0	presence	1	multiple irregular pits	0	small	0	slender or slightly swollen, triangular and moderately swollen	2	flask shape	1	1 seta each	1	<=2	1	absence	0	absence	0	joined for a short distance	2	Mammals, birds	1	1	punctatus
puncticollis	4	0	Presence	1	absence	0	single, multiple irregular pits	2	small	0	slender or slightly swollen, triangular and moderately swollen	2	flask shape	1	1 seta each	1	<=2	1	absence	0	absence	0	separated widely	5	Mammals	1	0	puncticollis
reconditus	8	1	Presence	1	absence	0	single	1	narrow opening and deep pit	0	strongly swollen	0	flask shape	1	2 seta each	0	<=2	1	absence	0	absence	0	separated narrowly	1	Birds	0	1	reconditus
riethi	4	0	Presence	1	absence	0	single, multiple irregular pits	2	small	0	slender or slightly swollen, triangular and moderately swollen	2	flask shape	1	1 seta each	1	<=2	1	absence	0	absence	0	separated widely	5	Mammals	1	0	riethi
salinarius	12	2	Presence	1	presence	1	single	1	wide opening and shallow pit	1	triangular and moderately swollen	1	flask shape	1	2 seta each	0	<=2; >2	2	absence	0	presence	1	separated narrowly	1	Birds	0	1	salinarius
santonicus	13	2	Presence	1	presence	1	multiple irregular pits	0	small	0	triangular and moderately swollen	1	flask shape	1	2 seta each	0	<=2	1	absence	0	absence	0	separated narrowly	1	Mammals	1	0	santonicus
scoticus	6	0	Absence	0	presence	1	single	1	narrow opening and shallow pit	0	slender or slightly swollen, triangular and moderately swollen	2	flask shape	1	1 seta each	1	<=2	1	absence	0	absence	0	joined for a short distance	2	Mammals, birds	1	1	scoticus
segnis	12	2	Presence	1	presence	1	single	1	narrow opening and deep pit	0	strongly swollen	0	flask shape	1	2 seta each	0	<=2	1	absence	0	absence	0	separated narrowly	1	Mammals	1	0	segnis
semimaculatus	8	1	Presence	1	absence	0	single	1	narrow opening and deep pit	0	strongly swollen	0	inflated	0	1 seta each	1	<=2; >2	2	absence	0	absence	0	separated narrowly	1	Mammals, birds	1	1	semimaculatus
shaklawensis	6	0	Absence	0	presence	1	single	1	wide opening and shallow pit	1	triangular and moderately swollen	1	flask shape	1	2 seta each	0	<=2	1	absence	0	absence	0	separated narrowly	1	Mammals	1	0	shaklawensis
simulator	13	2	Presence	1	presence	1	multiple irregular pits	0	small	0	slender or slightly swollen	3	flask shape	1	1 seta each	1	<=2	1	absence	0	absence	0	separated widely	5	Mammals	1	0	simulator
stigma	4	0	Presence	1	absence	0	single	1	wide opening and shallow pit	1	triangular and moderately swollen	1	flask shape	1	2 seta each	0	<=2	1	absence	0	absence	0	separated narrowly	1	Mammals	1	0	stigma
subfagineus	6	0	Absence	0	presence	1	multiple irregular pits	0	small	0	slender or slightly swollen	3	flask shape	1	1 seta each	1	<=2	1	presence	1	absence	0	joined for a short distance	2	Mammals	1	0	subfagineus
subfsaciipennis	6	0	Absence	0	presence	1	multiple irregular pits	0	small	0	triangular and moderately swollen	1	flask shape	1	1 seta each	1	<=2	1	absence	0	absence	0	separated narrowly	1	Mammals	1	0	subfsaciipennis
truncorum	9	1	Presence	1	presence	1	single	1	wide opening and shallow pit	1	strongly swollen	0	flask shape	1	2 seta each	0	<=2	1	absence	0	absence	0	separated narrowly	1	Birds	0	1	truncorum
vexans	9	1	Presence	1	presence	1	multiple irregular pits	0	small	0	triangular and moderately swollen	1	flask shape	1	2 seta each	0	<=2	1	absence	0	absence	0	separated narrowly	1	Mammals, birds	1	1	vexans
